# Supplementary material for: Butyl Benzyl Phthalate in Urban Sewage by Magnetic-Based Immunoassay: Environmental Levels and Risk Assessment
Source: MDPI journal article supplement (doi:10.3390/bios12010045), 2022-01-15
Supplement: s1 [file s1]

## **Supplementary data**

**Figure S1.** The Effect of methanol, Na<sup>+</sup> and pH value on the sensitivity MBI.

**Figure S2.** The matrix effect of water samples on the sensitivity of MBI.

**Figure S3.** The correlation between the MBI and HPLC for BBP.

**Table S1.** The sampling coordinates of environmental water samples.

**Table S2.** The key parameters for the proposed MBI.

**Table S3.** The optimal concentration of antigen and antibody.

**Table S4.** The results of cross-reactivity for MBI.

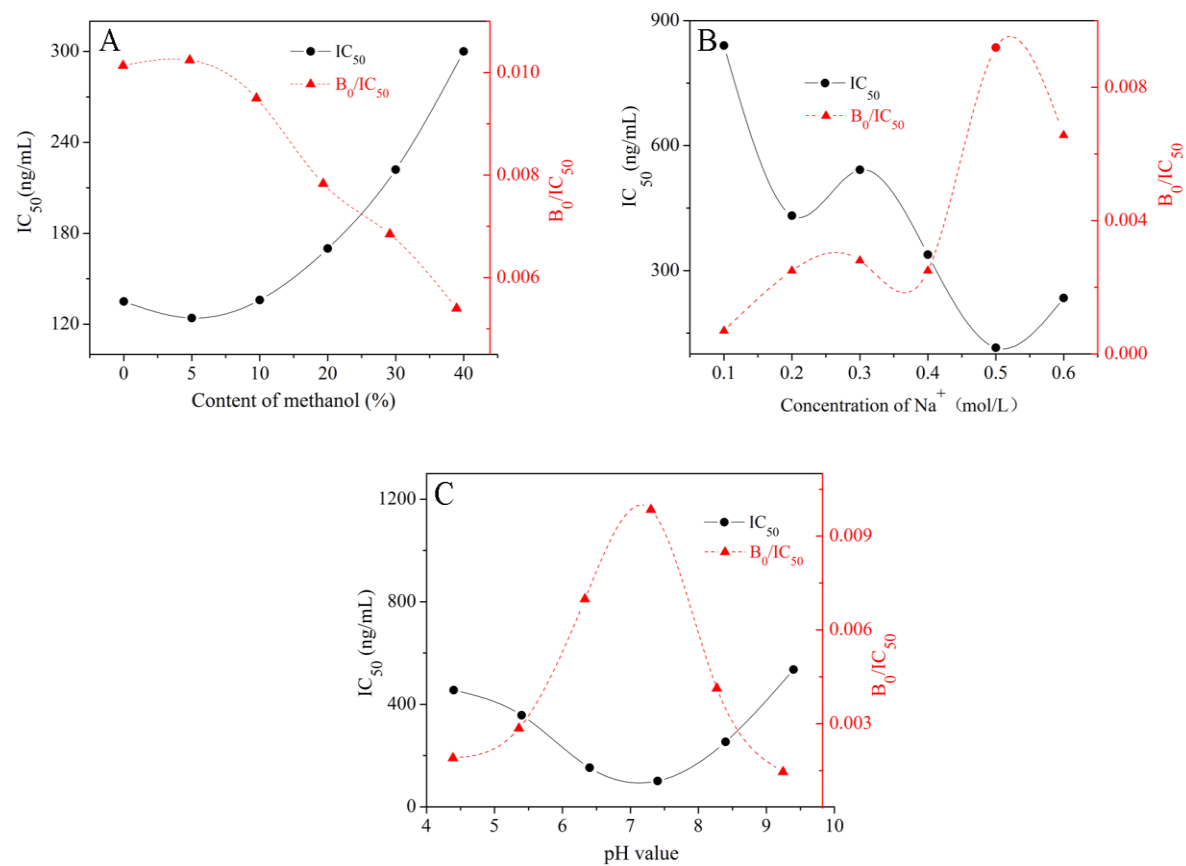

**Figure S1.** The Effect of methanol (A),  $Na^+$  (B) and pH value (C) on the sensitivity of MBI.

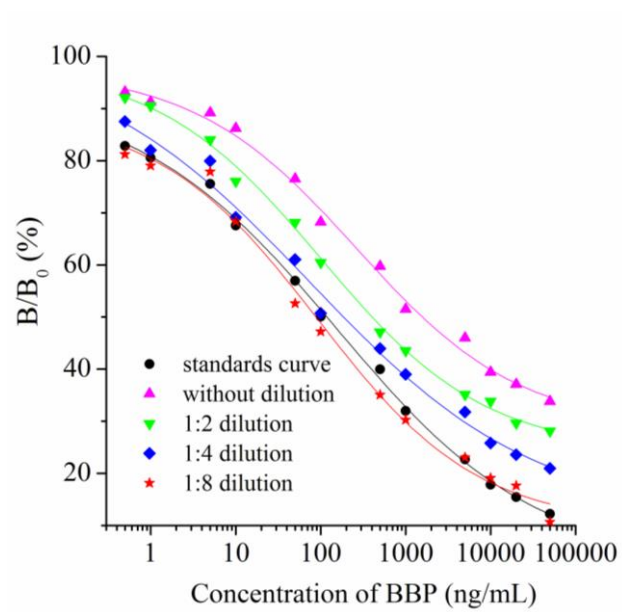

**Figure S2.** The matrix effect of water samples on the sensitivity of MBI.

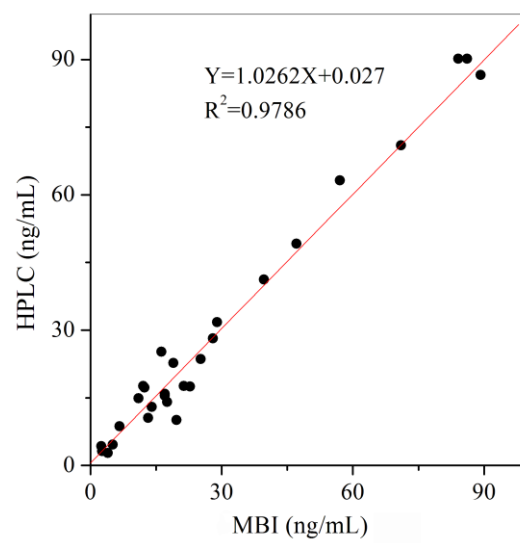

**Figure S3.** The correlation between the MBI and HPLC for BBP (The LOD was 0.15 ng/mL for HPLC).

**Table S1.** The sampling coordinates of environmental water samples.

| Sample | Coordinates                  | Sample | Coordinates                  |
|--------|------------------------------|--------|------------------------------|
| S1     | E119°22'21.02" N32°11'2.54"  | S19    | E119°30'13.39" N32°10'45.86" |
| S2     | E119°23'27.70" N32°11'29.68" | S20    | E119°29'57.81" N32°10'12.27" |
| S3     | E119°24'7.87" N32°11'57.39"  | S21    | E119°29'45.45" N32°09'20.99" |
| S4     | E119°24'12.82" N32°12'16.74" | S22    | E119°30'14.64" N32°08'21.44" |
| S5     | E119°25'12.18" N32°12'27.74" | S23    | E119°30'24.51" N32°11'6.78"  |
| S6     | E119°25'2.28" N32°11'30.20"  | S24    | E119°31'14.84" N32°11'31.05" |
| S7     | E119°25'46.88" N32°11'34.97" | S25    | E119°13'27.51" N32°10'56.63" |
| S8     | E119°24'53.63" N32°10'45.74" | S26    | E119°32'45.34" N32°10'17.48" |
| S9     | E119°24'54.25" N32°09'41.90" | S27    | E119°33'29.33" N32°09'48.26" |
| S10    | E119°26'20.57" N32°13'3.90"  | S28    | E119°33'16.35" N32°09'7.97"  |
| S11    | E119°12'41.93" N32°12'15.31" | S29    | E119°33'4.61" N32°08'8.32"   |
| S12    | E119°26'29.62" N32°12'14.80" | S30    | E119°33'23.15" N32°07'42.66" |
| S13    | E119°27'29.05" N32°11'55.53" | S31    | E119°34'0.94" N32°09'59.84"  |
| S14    | E119°27'44.57" N32°11'10.59" | S32    | E119°34'48.67" N32°10'17.18" |
| S15    | E119°27'40.84" N32°09'33.26" | S33    | E119°35'10.30" N32°11'1.65"  |
| S16    | E119°27'32.09" N32°08'27.24" | S34    | E119°41'51.12" N32°10'43.98" |
| S17    | E119°27'55.71" N32°11'35.19" | S35    | E119°42'18.26" N32°11'57.15" |
| S18    | E119°29'3.90" N32°11'29.59"  | S36    | E119°40'33.35" N32°12'47.55" |

**Table S2.** The key parameters for the proposed MBI.

| Factor                      | Parameter  | Factor                  | Parameter |
|-----------------------------|------------|-------------------------|-----------|
| Magnetic antigen probe      | 0.6 ng/mL  | Methanol ( $v/v$ , %)   | 5         |
| Biotinylated antibody probe | 2.5 ng/mL  | Na <sup>+</sup> (mol/L) | 0.5       |
| Streptavidin-HRP            | 18.9 ng/mL | pH value                | 7.4       |

**Table S3.** The optimal concentration of antigen and antibody.

|                                        |       | BBP-OVA (μg/mL)                          |       |                                      |        |                         |       |                         |       |                             |
|----------------------------------------|-------|------------------------------------------|-------|--------------------------------------|--------|-------------------------|-------|-------------------------|-------|-----------------------------|
|                                        |       | 10.6                                     | 5.3   | 2.65                                 | 10.6   | 5.3                     | 2.65  | 10.6                    | 5.3   | 2.65                        |
|                                        |       | Dilution ratio of magnetic antigen probe |       |                                      |        |                         |       |                         |       |                             |
|                                        |       | 1:2000                                   |       |                                      | 1:4000 |                         |       | 1:8000                  |       |                             |
| Biotinylated antibody probe<br>(ng/mL) | 10    | 2.648                                    | 2.204 | 1.739                                | 2.105  | 1.579                   | 1.421 | 1.789                   | 1.378 | 1.012<br>69.8% <sup>a</sup> |
|                                        | 5     | 2.365                                    | 1.856 | 1.548                                | 1.714  | 1.359                   | 1.256 | 1.556                   | 1.126 | 0.894                       |
|                                        | 2.5   | 2.106                                    | 1.366 | <b>1.056/<br/>65.4%</b> <sup>a</sup> | 1.553  | 1.142                   | 0.884 | 1.341                   | 0.879 | 0.578                       |
|                                        | 1.25  | 1.896                                    | 1.21  | 0.897                                | 1.482  | <b>1.005/<br/>70.3%</b> | 0.674 | 1.289                   | 0.523 | 0.245                       |
|                                        | 0.625 | 1.483                                    | 1.136 | 0.699                                | 1.189  | 0.752                   | 0.389 | <b>1.045/<br/>64.8%</b> | 0.312 | 0.098                       |

<sup>a</sup> Inhibition: The 10 μg/mL BBP was used to test the inhibition experiment when the value of B<sub>0</sub> was approximately 1.0.

**Table S4.** The results of cross-reactivity for MBI.

| Compound                             | Structure                                                                           | IC <sub>50</sub><br>(ng/mL) | CR<br>(%) |
|--------------------------------------|-------------------------------------------------------------------------------------|-----------------------------|-----------|
| Benzyl butyl phthalate (BBP)         | 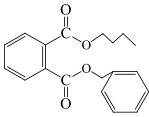   | 119.61                      | 100       |
| Dibutyl phthalate (DBP)              |    | 2682.93                     | 4.5       |
| Dimethyl phthalate (DMP)             |    | 4514.03                     | 2.7       |
| Diethyl phthalate (DEP)              |    | 3781.25                     | 3.2       |
| Diisobutyl phthalate (DIBP)          |   | 5873.79                     | 2.0       |
| Bis (2-ethyl hexyl) phthalate (DEHP) |  | 3878.21                     | 3.1       |
| Dicyclohexyl phthalate (DCHP)        |  | >10000                      | <1.2      |
| Di-n-octyl phthalate (DnOP)          |  | >10000                      | <1.2      |
| Diisodecyl phthalate (DIDP)          |  | >10000                      | <1.2      |
